# Supplementary material
Source: MDPI journal article supplement (https://www.mdpi.com/2227-9717/9/6/1007)
Supplement: s1 [file s1]

## Article

# Comparative Study of a Life Cycle Assessment for Bio-Plastic Straws and Paper Straws: Malaysia's Perspective

Chun-Hung Moy <sup>1</sup>, Lian-See Tan <sup>1</sup>, Noor Fazliani Shoparwe <sup>2</sup>, Azmi Mohd Shariff <sup>3</sup> and Jully Tan <sup>4,\*</sup>

<sup>1</sup> Malaysia-Japan International Institute of Technology, Universiti Teknologi Malaysia, Jalan Sultan Yahya Petra, Kuala Lumpur 54100, Malaysia; hung9098703@rocketmail.com (M.C.H.); tan.liansee@utm.my (T.L.S.)

<sup>2</sup> Faculty of Bioengineering and Technology, Jeli Campus, Universiti Malaysia Kelantan, Jeli, Kelantan 17600, Malaysia; fazliani.s@umk.edu.my

<sup>3</sup> Chemical Engineering Department, Universiti Teknologi PETRONAS, Seri Iskandar, Perak 32610, Malaysia; azmish@utp.edu.my

<sup>4</sup> School of Engineering, Monash University Malaysia, Jalan Lagoon Selatan, Bandar Sunway, Selangor 47500, Malaysia

\* Correspondence: tan.jully@monash.edu

## Supplementary Data

**Table S1.** Equipment details of corn starch production (Section 1) based on SuperPro Designer.

| Equipment Code/Name               | Description                                       | Equipment Setup Information                                                                                                                                                                                                                    |
|-----------------------------------|---------------------------------------------------|------------------------------------------------------------------------------------------------------------------------------------------------------------------------------------------------------------------------------------------------|
| V-101<br>Pre-treatment tank       | Increase the moisture content in the corn kernel. | <ul style="list-style-type: none"> <li>3 pretreatment tanks in series</li> <li>6 h of residence time</li> <li>Operating temperature of 55 °C</li> <li>Power consumption 23 kW per unit</li> </ul>                                              |
| V-102<br>Enzymatic treatment tank | Remove the soluble solids.                        | <ul style="list-style-type: none"> <li>4 enzymatic treatment tanks in series</li> <li>3 h of residence time</li> <li>75% volume filled</li> <li>Operating temperature of 50 °C and pH 4.5</li> <li>Power consumption 23 kW per unit</li> </ul> |
| DS-101<br>Centrifuge 1            | Mill Starch (MS) thickener                        | <ul style="list-style-type: none"> <li>7939 L/min throughput</li> <li>25% (<i>w/w</i>) solids in underflow</li> <li>Power consumption 189 kW per unit</li> </ul>                                                                               |
| DS-102<br>Centrifuge 2            | Primary separator                                 | <ul style="list-style-type: none"> <li>3218 L/min throughput</li> <li>33% (<i>w/w</i>) solids in underflow</li> <li>Power consumption 148 kW per unit</li> </ul>                                                                               |
| DS-103<br>Centrifuge 3            | Gluten thickener                                  | <ul style="list-style-type: none"> <li>3112 L/min throughput</li> <li>17% (<i>w/w</i>) solids in underflow</li> <li>Power consumption 50 kW per unit</li> </ul>                                                                                |
| DS-104<br>Centrifuge 4            | Clarifier                                         | <ul style="list-style-type: none"> <li>3945 L/min throughput</li> <li>28% (<i>w/w</i>) solids in underflow</li> <li>Power consumption 25 kW per unit</li> </ul>                                                                                |
| CY-101<br>Hydrocyclone            | Starch washing                                    | <ul style="list-style-type: none"> <li>4558 L/min throughput</li> <li>1.3 kg fresh water/kg of dry corn</li> <li>Power consumption 15 kW per unit</li> </ul>                                                                                   |

**Table S2.** Equipment details of lactic acid production (Section 2) based on SuperPro Designer.

| Equipment Code/Name            | Description             | Equipment Setup Information                                                                                                                            |
|--------------------------------|-------------------------|--------------------------------------------------------------------------------------------------------------------------------------------------------|
| V-101<br>Condenser             | Condensation            | <ul style="list-style-type: none"> <li>Remove water with 90% efficiency</li> <li>Power consumption 0.5 kW per unit</li> </ul>                          |
| R-101<br>Depolymerization tank | Stoichiometric Reaction | <ul style="list-style-type: none"> <li>Depolymerization process</li> <li>Formation of lactide</li> <li>Power consumption 0.0022 kW per unit</li> </ul> |
| R-102<br>Polymerization tank   | Stoichiometric Reaction | <ul style="list-style-type: none"> <li>Ring-opening polymerization</li> <li>Formation of PLA</li> <li>Power consumption 0.0025 kW per unit</li> </ul>  |
| CR-101<br>Crystallizer         | Crystallization         | <ul style="list-style-type: none"> <li>Solidify PLA</li> <li>Power consumption 0.3 kW per unit</li> </ul>                                              |
| GRN-101<br>Granulator          | Granulation             | <ul style="list-style-type: none"> <li>Formation of PLA resins</li> <li>Power consumption 5.5 kW per unit</li> </ul>                                   |

**Table S3.** Equipment details of bio-plastic production (Section 3) based on SuperPro Designer.

| Equipment Code/Name             | Description                 | Equipment Setup Information                                                                                                                                                                                                                                                                                                                                                    |
|---------------------------------|-----------------------------|--------------------------------------------------------------------------------------------------------------------------------------------------------------------------------------------------------------------------------------------------------------------------------------------------------------------------------------------------------------------------------|
| R-101<br>Saccharification tank  | Stoichiometric Reaction     | <ul style="list-style-type: none"> <li>Operating temperature of 90 °C</li> <li>Saccharification of starch into dextrose molecules: <math>(C_6H_{10}O_5)_n + nH_2O \rightarrow nC_6H_{12}O_6</math></li> <li>Power consumption 7.7 kW per unit</li> </ul>                                                                                                                       |
| FR-101<br>Fermentation tank     | Stoichiometric Fermentation | <ul style="list-style-type: none"> <li>Operating temperature of 37 °C and pH 6</li> <li>Fermentation of dextrose into lactic acid: <math>C_6H_{12}O_6 \rightarrow 2C_3H_6O_3 + \text{biomass}</math></li> <li>Calcium lactate formation: <math>2C_3H_6O_3 + Ca(OH)_2 \rightarrow C_3H_5O_3Ca^+O_3^-H_5C_3 + 2H_2O</math></li> <li>Power consumption 690 kW per unit</li> </ul> |
| MF-101<br>Microfilter           | Microfiltration             | <ul style="list-style-type: none"> <li>Power consumption 606 kW</li> </ul>                                                                                                                                                                                                                                                                                                     |
| V-101<br>Acidification tank     | Acidification               | <ul style="list-style-type: none"> <li>Dissociation of calcium lactate with sulfuric acid: <math>C_3H_5O_3Ca^+O_3^-H_5C_3 + H_2SO_4 \rightarrow CaSO_4 + 2C_3H_6O_3</math></li> <li>Power consumption 3.7 kW per unit</li> </ul>                                                                                                                                               |
| RVF-101<br>Rotary vacuum filter | Rotary Vacuum Filtration    | <ul style="list-style-type: none"> <li>Remove gypsum (<math>CaSO_4</math>)</li> <li>Power consumption 224 kW per unit</li> </ul>                                                                                                                                                                                                                                               |
| EV-101<br>Evaporator            | Evaporation                 | <ul style="list-style-type: none"> <li>Remove water</li> <li>Power consumption 3.2 kW per unit</li> </ul>                                                                                                                                                                                                                                                                      |

**Table S4.** Equipment details of bio-plastic straws production (Section 4) based on SuperPro Designer.

| Equipment Code/Name        | Description       | Equipment Setup Information                                                                                                                                                                                        |
|----------------------------|-------------------|--------------------------------------------------------------------------------------------------------------------------------------------------------------------------------------------------------------------|
| XD-101<br>Extruder         | Extrusion         | <ul style="list-style-type: none"> <li>Power consumption 20 kW per unit</li> <li>Screw Angular Velocity 300 rpm</li> </ul>                                                                                         |
| IM-101<br>Injection molder | Injection Molding | <ul style="list-style-type: none"> <li>Physical properties assume to be same as PP</li> <li>Power consumption 15 kW per unit</li> <li>Straws diameter 2–12 mm</li> <li>Raw material capacity 20–60 kg/h</li> </ul> |
| LB-101<br>Labeler          | Labeling          | Power consumption 2.2 kW per unit                                                                                                                                                                                  |
| BX-101<br>Packet packager  | Packaging         | <ul style="list-style-type: none"> <li>Power consumption 5.4 kW per unit</li> <li>A packet consists of 300 bio-plastic straws</li> </ul>                                                                           |
| BX-102<br>Box packager     | Packaging         | <ul style="list-style-type: none"> <li>Power consumption 0.34 kW per unit</li> <li>A box consists of 16 unit packets</li> </ul>                                                                                    |

**Table S5.** Equipment details of delivery to consumer and disposal of bio-plastic straws (Section 5) based on SuperPro Designer.

| Equipment Code/Name      | Description        | Equipment Setup Information                                                                                                                   |
|--------------------------|--------------------|-----------------------------------------------------------------------------------------------------------------------------------------------|
| CM-101<br>Consumers      | Indicate Consumers | <ul style="list-style-type: none"> <li>Simply pass through block</li> <li>Assume no reaction occurs</li> </ul>                                |
| FSP-101<br>Flow splitter | Flow Splitting     | <ul style="list-style-type: none"> <li>The used PLA are split equally to industrial composting facility, landfill and incineration</li> </ul> |
| LF-101<br>Landfill       | Landfill process   | <ul style="list-style-type: none"> <li>PLA decompose in anaerobic landfill environment:<br/>PLA → methane + carbon dioxide</li> </ul>         |
| INC-101 Incinerator      | Incineration       | <ul style="list-style-type: none"> <li>Required fuel and air</li> </ul>                                                                       |
| CPT-101<br>Composter     | Composting         | <ul style="list-style-type: none"> <li>PLA in industrial composting facility:<br/>PLA + heat + microbe → carbon dioxide + water</li> </ul>    |

**Table S6.** Equipment details of paper straws production (Section 4) based on SuperPro Designer.

| Equipment Code/Name            | Description                  | Equipment Setup Information                                                       |
|--------------------------------|------------------------------|-----------------------------------------------------------------------------------|
| PSM-101<br>Paper straw machine | Gluings, Winding and Cutting | <ul style="list-style-type: none"> <li>Power consumption 7 kW per unit</li> </ul> |

**Table S7.** Equipment details of delivery to consumer and disposal of paper straws (Section 5) based on SuperPro Designer.

| Equipment Code/Name      | Description        | Equipment Setup Information                                                                                                                            |
|--------------------------|--------------------|--------------------------------------------------------------------------------------------------------------------------------------------------------|
| CM-101<br>Consumers      | Indicate Consumers | <ul style="list-style-type: none"> <li>Simply pass through block</li> <li>Assume no reaction occurs</li> </ul>                                         |
| FSP-101<br>Flow splitter | Flow Splitting     | <ul style="list-style-type: none"> <li>The used paper straws are split equally to industrial composting facility, landfill and incineration</li> </ul> |
| LF-101 Landfill          | Landfill process   | <ul style="list-style-type: none"> <li>Paper decompose in anaerobic landfill environment:<br/>Paper → methane + carbon dioxide</li> </ul>              |
| INC-101 Incinerator      | Incineration       | <ul style="list-style-type: none"> <li>Required fuel and air</li> </ul>                                                                                |
| CPT-101 Composter        | Composting         | <ul style="list-style-type: none"> <li>Paper in industrial composting facility:<br/>Paper + heat + microbe → carbon dioxide + water</li> </ul>         |

**Table S8.** Process data inventory of bio-plastic straws production obtained from SuperPro Designer simulator (based on 100 drinking straws unit functional).

| Section/Process         | Corn Starch Production (Section 1) |                      |                      |                      |                      | Lactic Acid Production (Section 2) |                                           |                      |                      |                          |                      |
|-------------------------|------------------------------------|----------------------|----------------------|----------------------|----------------------|------------------------------------|-------------------------------------------|----------------------|----------------------|--------------------------|----------------------|
|                         | Corn Steeping                      | Germ Separation      | Fiber Separation     | Gluten Separation    | Starch Separation    | Saccharification of Starch         | Fermentation of Dextrose into Lactic Acid | Microfiltration      | Acidification        | Rotary Vacuum Filtration | Evaporation          |
| Power Consumption (kWh) | 1.7                                | 9.8                  | 5.2                  | 4.0                  | 5.3                  | $6.8 \times 10^{-2}$               | 6.1                                       | 5.4                  | $3.3 \times 10^{-2}$ | 2.0                      | $2.8 \times 10^{-2}$ |
| CO (g)                  | $2.6 \times 10^{-1}$               | 1.5                  | $7.7 \times 10^{-1}$ | $6.0 \times 10^{-1}$ | $8.0 \times 10^{-1}$ | $1.0 \times 10^{-2}$               | $9.2 \times 10^{-1}$                      | $8.0 \times 10^{-1}$ | $5.0 \times 10^{-3}$ | $3.0 \times 10^{-1}$     | $4.2 \times 10^{-3}$ |
| VOC (g)                 | $3.0 \times 10^{-2}$               | $1.7 \times 10^{-1}$ | $8.9 \times 10^{-2}$ | $6.9 \times 10^{-2}$ | $9.2 \times 10^{-2}$ | $1.2 \times 10^{-3}$               | $1.1 \times 10^{-1}$                      | $9.3 \times 10^{-2}$ | $5.7 \times 10^{-3}$ | $3.4 \times 10^{-2}$     | $4.9 \times 10^{-4}$ |
| CO <sub>2</sub> (g)     | $1.1 \times 10^3$                  | $6.3 \times 10^3$    | $3.4 \times 10^3$    | $2.6 \times 10^3$    | $3.5 \times 10^3$    | $4.4 \times 10^1$                  | $4.0 \times 10^3$                         | $3.5 \times 10^3$    | $2.2 \times 10^1$    | $1.3 \times 10^3$        | $1.8 \times 10^1$    |
| NO <sub>x</sub> (g)     | 1.5                                | 8.5                  | 4.5                  | 3.5                  | 4.6                  | $5.9 \times 10^{-2}$               | 5.3                                       | 4.7                  | $2.9 \times 10^{-2}$ | 1.7                      | $2.5 \times 10^{-2}$ |
| SO <sub>2</sub> (g)     | 7.9                                | 6.7                  | 3.6                  | 2.8                  | 3.7                  | $4.7 \times 10^{-2}$               | 4.2                                       | 3.7                  | $2.3 \times 10^{-2}$ | 1.4                      | $2.0 \times 10^{-2}$ |
| NH <sub>3</sub> (g)     | 0.0                                | $9.8 \times 10^{-3}$ | 0.0                  | $2.4 \times 10^{-2}$ | $1.3 \times 10^{-4}$ | 0.0                                | 0.0                                       | 0.0                  | 0.0                  | 0.0                      | 0.0                  |
| CH <sub>4</sub> (g)     | 0.0                                | 0.0                  | 0.0                  | 0.0                  | 0.0                  | 0.0                                | 0.0                                       | 0.0                  | 0.0                  | 0.0                      | 0.0                  |

**Table S9.** Process data inventory of bio-plastic straws production obtained from SuperPro Designer simulator (based on 100 drinking straws unit functional) (continue).

| Section/Process         | Polylactic Acid Production (Section 3) |                      |                             |                      |                      | PLA Straw Production (Section 4) |                      |                      |                      | To Consumer and End of Life of PLA Straw (Section 5) |                      |                      |
|-------------------------|----------------------------------------|----------------------|-----------------------------|----------------------|----------------------|----------------------------------|----------------------|----------------------|----------------------|------------------------------------------------------|----------------------|----------------------|
|                         | Condensation                           | Depolymerization     | Ring-opening Polymerization | Crystallization      | Granulation          | Extrusion                        | Injection Moulding   | Labelling            | Packaging            | Composting                                           | Landfill             | Incineration         |
| Power Consumption (kWh) | $4.4 \times 10^{-3}$                   | $1.9 \times 10^{-5}$ | $2.2 \times 10^{-5}$        | $2.7 \times 10^{-3}$ | $4.9 \times 10^{-2}$ | $1.8 \times 10^{-1}$             | $1.3 \times 10^{-1}$ | $2.0 \times 10^{-2}$ | $5.1 \times 10^{-2}$ | $1.3 \times 10^{-2}$                                 | $4.5 \times 10^{-4}$ | $1.8 \times 10^{-3}$ |
| CO (g)                  | $6.6 \times 10^{-4}$                   | $2.9 \times 10^{-6}$ | $3.3 \times 10^{-6}$        | $4.0 \times 10^{-4}$ | $7.4 \times 10^{-3}$ | $2.7 \times 10^{-2}$             | $2.0 \times 10^{-2}$ | $2.9 \times 10^{-3}$ | $7.6 \times 10^{-3}$ | $2.0 \times 10^{-3}$                                 | $6.8 \times 10^{-5}$ | $2.7 \times 10^{-4}$ |
| VOC (g)                 | $7.7 \times 10^{-5}$                   | $3.3 \times 10^{-7}$ | $3.8 \times 10^{-7}$        | $4.6 \times 10^{-5}$ | $8.5 \times 10^{-4}$ | $3.1 \times 10^{-3}$             | $2.3 \times 10^{-3}$ | $3.4 \times 10^{-4}$ | $8.8 \times 10^{-4}$ | $2.3 \times 10^{-4}$                                 | $7.8 \times 10^{-6}$ | $3.1 \times 10^{-5}$ |
| CO <sub>2</sub> (g)     | 2.9                                    | $1.2 \times 10^{-2}$ | $1.4 \times 10^{-2}$        | 1.7                  | $3.2 \times 10^1$    | $1.2 \times 10^2$                | $8.7 \times 10^1$    | $1.3 \times 10^1$    | $3.3 \times 10^1$    | $2.4 \times 10^1$                                    | 2.0                  | $1.9 \times 10^1$    |
| NO <sub>x</sub> (g)     | $3.9 \times 10^{-3}$                   | $1.7 \times 10^{-5}$ | $1.9 \times 10^{-5}$        | $2.3 \times 10^{-3}$ | $4.3 \times 10^{-2}$ | $1.5 \times 10^{-1}$             | $1.2 \times 10^{-1}$ | $1.7 \times 10^{-2}$ | $4.4 \times 10^{-2}$ | $1.1 \times 10^{-2}$                                 | $3.9 \times 10^{-4}$ | $1.5 \times 10^{-3}$ |
| SO <sub>2</sub> (g)     | $3.1 \times 10^{-3}$                   | $1.3 \times 10^{-5}$ | $1.5 \times 10^{-5}$        | $1.8 \times 10^{-3}$ | $3.4 \times 10^{-2}$ | $1.2 \times 10^{-1}$             | $9.2 \times 10^{-2}$ | $1.3 \times 10^{-2}$ | $3.5 \times 10^{-2}$ | $9.1 \times 10^{-3}$                                 | $3.1 \times 10^{-4}$ | $1.2 \times 10^{-3}$ |
| NH <sub>3</sub> (g)     | 0.0                                    | 0.0                  | 0.0                         | 0.0                  | 0.0                  | 0.0                              | 0.0                  | 0.0                  | 0.0                  | 0.0                                                  | 0.0                  | 0.0                  |
| CH <sub>4</sub> (g)     | 0.0                                    | 0.0                  | 0.0                         | 0.0                  | 0.0                  | 0.0                              | 0.0                  | 0.0                  | 0.0                  | 0.0                                                  | $6.0 \times 10^{-4}$ | 0.0                  |

**Table S10.** Process data inventory of paper straws production obtained from SuperPro Designer simulator (based on 100 drinking straws unit functional).

| Section/<br>Process  | Wood Preparation<br>(Section 1) |                         |                       | Kraft Pulping Process<br>(Section 2) |                    |            |                      |                                    | Papermaking Process<br>(Section 3) |                                             |                      | Paper Straw<br>Production<br>(Section 4) | To consumer and End of Life of PLA Straw<br>(Section 5) |                      |                      |
|----------------------|---------------------------------|-------------------------|-----------------------|--------------------------------------|--------------------|------------|----------------------|------------------------------------|------------------------------------|---------------------------------------------|----------------------|------------------------------------------|---------------------------------------------------------|----------------------|----------------------|
|                      | Debarking                       | Chipping &<br>Conveying | Biomass<br>Combustion | Recovery of<br>Boiler                | Lime<br>Combustion | Smelt Tank | Bunker Oil<br>Use    | Aerobic<br>Biological<br>Treatment | Paper Refining<br>& Screening      | Paper<br>Forming,<br>Pressing,<br>Finishing | Paper Drying         | Paper<br>Drinking Straw<br>Machine       | Composting                                              | Landfill             | Incineration         |
| Power                |                                 |                         |                       |                                      |                    |            |                      |                                    |                                    |                                             |                      |                                          |                                                         |                      |                      |
| Consumption (kWh)    | $7.6 \times 10^{-3}$            | $2.7 \times 10^{-2}$    | 0.0                   | 0.0                                  | 0.0                | 0.0        | 0.0                  | 0.0                                | $6.4 \times 10^{-2}$               | $1.4 \times 10^{-1}$                        | $7.6 \times 10^{-3}$ | $1.2 \times 10^{-1}$                     | $2.6 \times 10^{-2}$                                    | $8.8 \times 10^{-4}$ | $3.5 \times 10^{-3}$ |
| CO (g)               | $1.1 \times 10^{-3}$            | $4.0 \times 10^{-3}$    | 0.0                   | 0.0                                  | 0.0                | 0.0        | 0.0                  | 0.0                                | $9.6 \times 10^{-3}$               | $2.1 \times 10^{-2}$                        | $1.1 \times 10^{-3}$ | $1.8 \times 10^{-2}$                     | $3.8 \times 10^{-3}$                                    | $1.3 \times 10^{-4}$ | $5.2 \times 10^{-4}$ |
| VOC (g)              | $1.3 \times 10^{-4}$            | $4.6 \times 10^{-4}$    | 0.0                   | 0.0                                  | 0.0                | 0.0        | 0.0                  | 0.0                                | $1.1 \times 10^{-3}$               | $2.4 \times 10^{-3}$                        | $1.3 \times 10^{-4}$ | $2.1 \times 10^{-3}$                     | $4.4 \times 10^{-4}$                                    | $1.5 \times 10^{-5}$ | $6.0 \times 10^{-5}$ |
| CO <sub>2</sub> (g)  | 5.0                             | $1.7 \times 10^1$       | $8.1 \times 10^5$     | $1.6 \times 10^3$                    | $3.7 \times 10^5$  | 0.0        | $3.0 \times 10^4$    | $2.6 \times 10^3$                  | $4.2 \times 10^1$                  | $8.9 \times 10^1$                           | 5.0                  | $7.9 \times 10^1$                        | $4.7 \times 10^1$                                       | $3.3 \times 10^1$    | $3.7 \times 10^1$    |
| NO <sub>x</sub> (g)  | $6.6 \times 10^{-3}$            | $2.3 \times 10^{-2}$    | $7.3 \times 10^2$     | $2.7 \times 10^2$                    | $8.6 \times 10^1$  | 2.5        | $7.8 \times 10^1$    | 0.0                                | $5.6 \times 10^{-2}$               | $1.2 \times 10^{-1}$                        | $6.6 \times 10^{-3}$ | $1.1 \times 10^{-1}$                     | $2.2 \times 10^{-2}$                                    | $7.7 \times 10^{-4}$ | $3.0 \times 10^{-3}$ |
| SO <sub>2</sub> (g)  | $5.3 \times 10^{-3}$            | $1.8 \times 10^{-2}$    | 0.0                   | $5.2 \times 10^1$                    | $1.4 \times 10^2$  | 7.6        | $4.6 \times 10^2$    | 0.0                                | $4.4 \times 10^{-2}$               | $9.5 \times 10^{-2}$                        | $5.3 \times 10^{-3}$ | $8.4 \times 10^{-2}$                     | $1.8 \times 10^{-2}$                                    | $6.1 \times 10^{-4}$ | $2.4 \times 10^{-3}$ |
| NH <sub>3</sub> (g)  | 0.0                             | 0.0                     | 0.0                   | 0.0                                  | 0.0                | 0.0        | 0.0                  | 0.0                                | 0.0                                | 0.0                                         | 0.0                  | 0.0                                      | 0.0                                                     | 0.0                  | 0.0                  |
| CH <sub>4</sub> (g)  | 0.0                             | 0.0                     | $2.2 \times 10^2$     | 0.0                                  | 0.0                | 0.0        | $8.5 \times 10^{-1}$ | $2.8 \times 10^1$                  | 0.0                                | 0.0                                         | 0.0                  | 0.0                                      | 0.0                                                     | $1.2 \times 10^{-2}$ | 0.0                  |
| N <sub>2</sub> O (g) | 0.0                             | 0.0                     | $2.9 \times 10^1$     | 0.0                                  | 0.0                | 0.0        | $2.1 \times 10^{-1}$ | 1.7                                | 0.0                                | 0.0                                         | 0.0                  | 0.0                                      | 0.0                                                     | 0.0                  | 0.0                  |

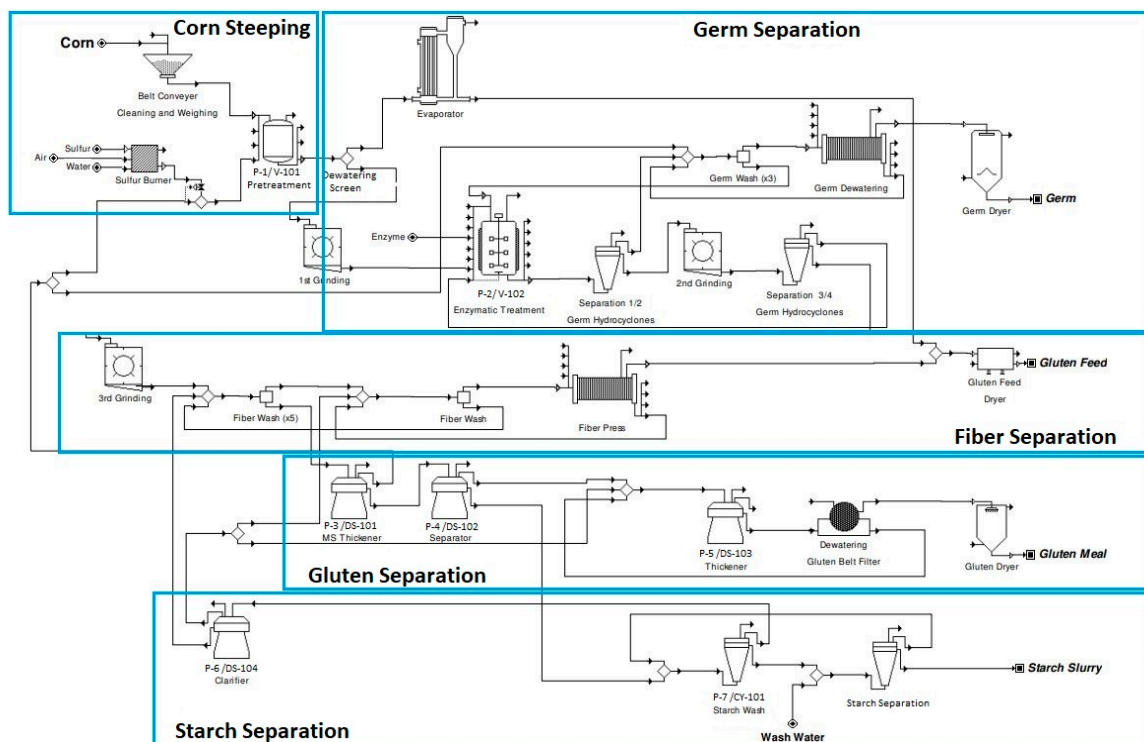

Figure S1. Overall process flow diagram of the corn starch production (Section 1).

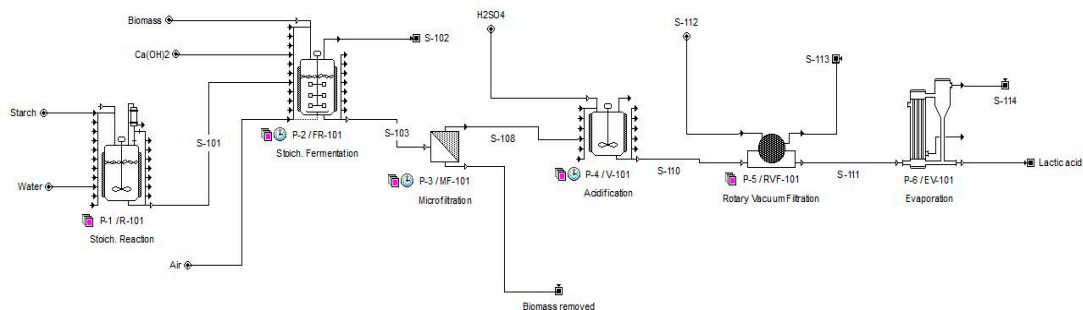

Figure S2. Process flow diagram of the lactic acid production (Section 2).

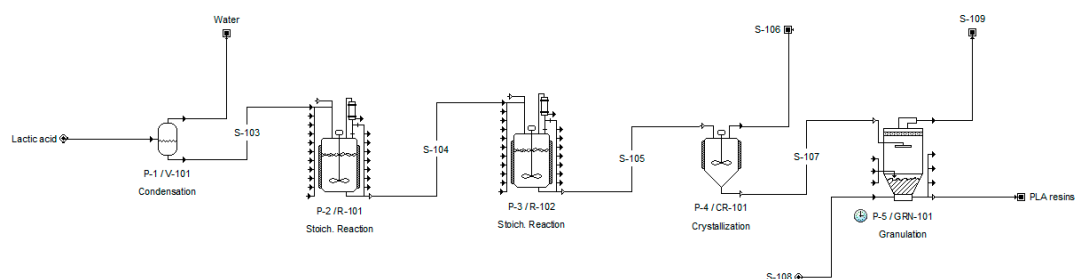

Figure S3. Process flow diagram of the bio-plastic production (Section 3).

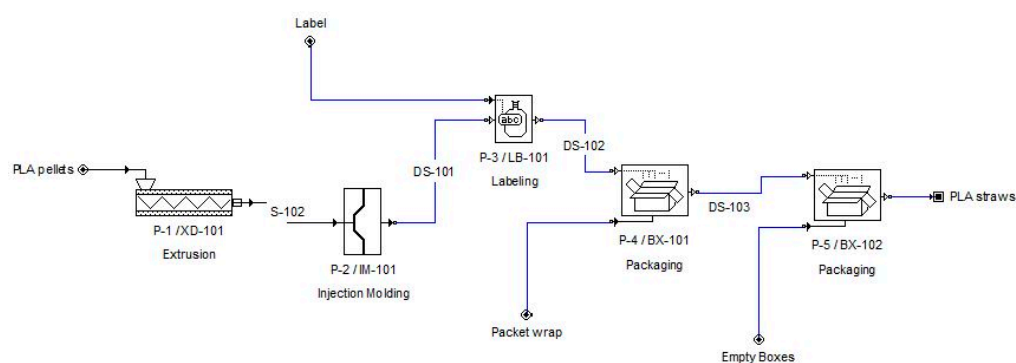

**Figure S4.** Process flow diagram of the bio-plastic straws production (Section 4).

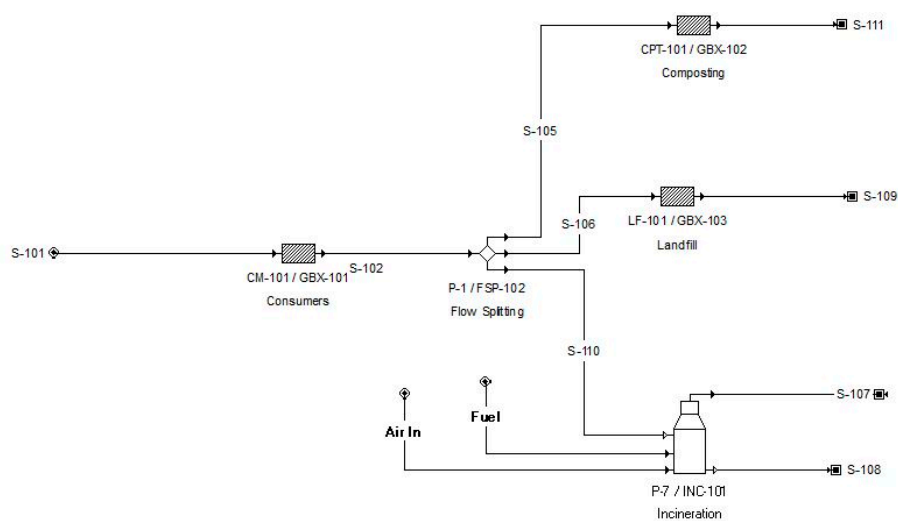

**Figure S5.** Process flow diagram of the delivery consumer and disposal of bio-plastic straws (Section 5).

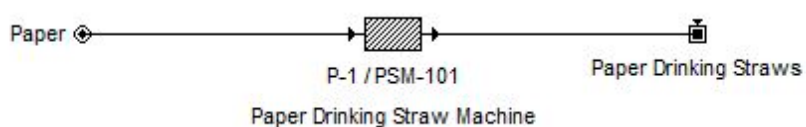

**Figure S6.** Process flow of the production of paper straws (Section 2).

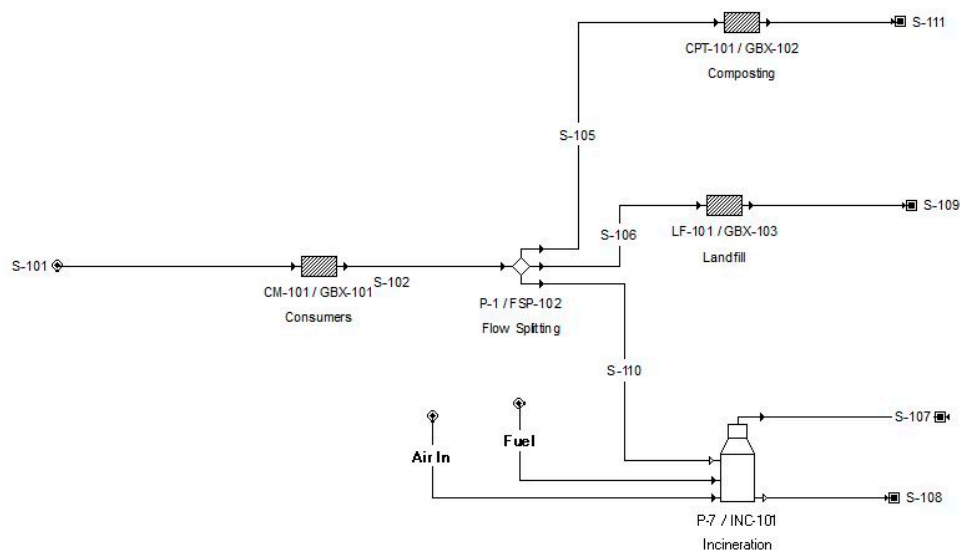

**Figure S7.** Process flow diagram of the delivery to consumer and disposal of paper straws (Section 5).

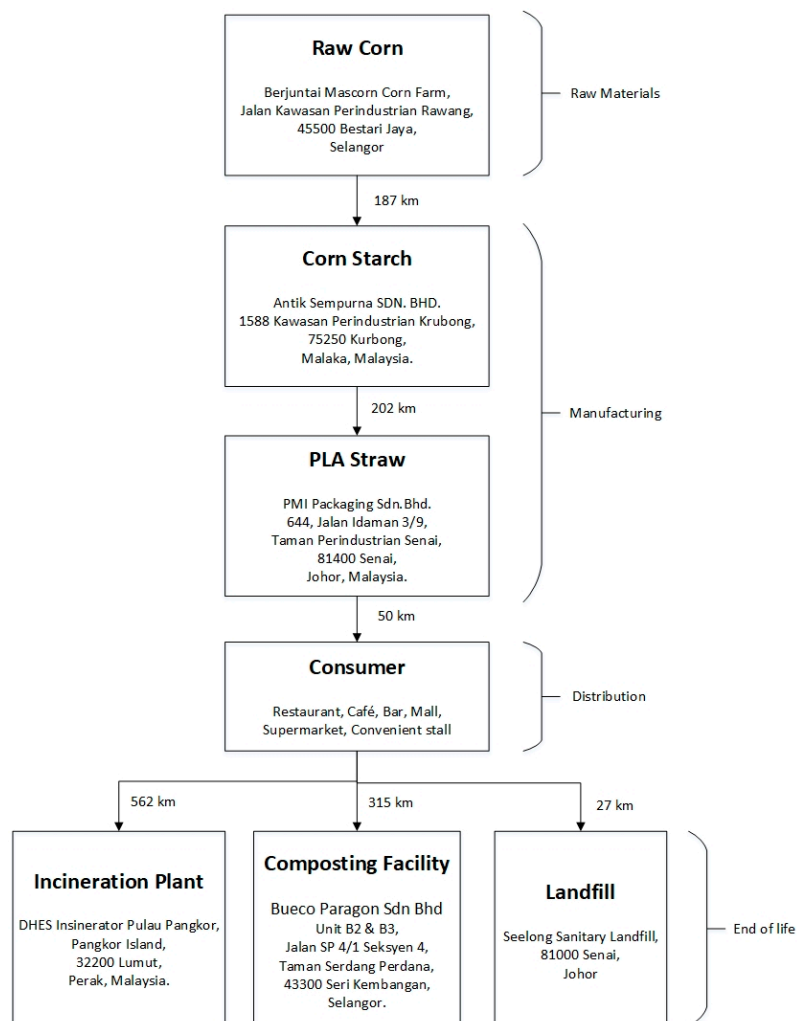

**Figure S8.** Transportation detail for the overall process for bio-plastic straws from gate to grave.



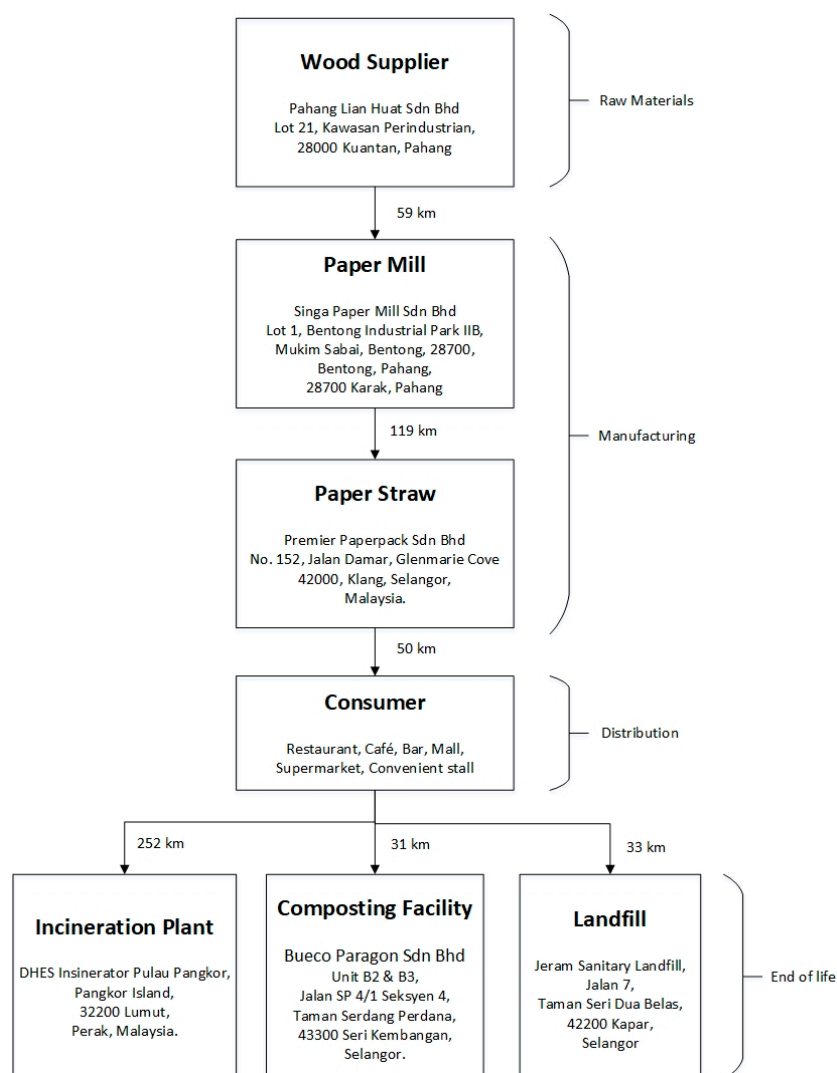

**Figure S9.** Transportation detail for the overall process for bio-plastic straws from gate to grave.
